# Supplementary material for: The validation of Corona Anxiety Questionnaire in Iranian Population
Source: Research Square preprint supplement (doi:10.21203/rs.3.rs-154443/v1), 2021-02-11
Supplement: Supplementary file 1 [file 5ccb5e6fba08546548e44b2b.docx]

**The validation of Corona Anxiety Questionnaire in Iranian Population**

Morteza Mehraeen

Shiraz HIV/AIDS Research Center (SHARC), Shiraz University of Medical Sciences, Shiraz, Iran

Mohammad Reza Heydari

Shiraz HIV/AIDS Research Center (SHARC), Shiraz University of Medical Sciences, Shiraz, Iran

Hassan Joulaei

Shiraz HIV/AIDS Research Center (SHARC), Shiraz University of Medical Sciences, Shiraz, Iran

Marjan Faghih*

Department of Biostatistics, School of Medicine, Arak University of Medical Sciences, Arak, Iran

* Correspondence: Biostatistics Department, Faculty of Medicine, Faculties Building, Payambar A'zam University Campus, Baseej Square, Sardasht, Arak, tel 08634173502, marjanfaghih94@gmail.com

| No. | Sentence | Very much | To some extent | Low | Not at all |
| --- | --- | --- | --- | --- | --- |
|  | Whenever I cough or sneeze, worry about getting Corona. |  |  |  |  |
|  | I keep asking myself, have I washed my hands enough? |  |  |  |  |
|  | As soon as rises the temperature of my body or my relatives, I become suspicious of Corona. |  |  |  |  |
|  | I avoid any physical contact, even with my children / parents, for fear of Corona. |  |  |  |  |
|  | I keep asking God, what sin have we committed that we owe to Corona? |  |  |  |  |
|  | I wake up at night with a Corona nightmare. |  |  |  |  |
|  | I have endured so much stress because of Corona that my body shows nervous reactions (such as hives or stomach pain, etc.) |  |  |  |  |
|  | Sometimes I think it is not possible to live with this disease and it is better to end it. |  |  |  |  |
|  | I am scared to see people wearing sanitary masks and gloves. |  |  |  |  |
|  | I constantly follow the news and media messages about Corona. |  |  |  |  |
|  | Recently, I have been following more medical news networks. |  |  |  |  |
|  | I stay at home because of the carelessness of the people. |  |  |  |  |
|  | I am not afraid of getting sick, I'm afraid that others will infect by me. |  |  |  |  |
|  | I am constantly careful not to approach others, lest there be a virus on their body. |  |  |  |  |
|  | I perform my religious rites carefully and on time. |  |  |  |  |
|  | I have no one to sympathize with. |  |  |  |  |
|  | Before Corona, I was very sensitive about health. |  |  |  |  |
|  | When I go to work (even in the kitchen), I feel like attract the virus. |  |  |  |  |
|  | I doubt which is more important:  My own health or my work responsibilities. |  |  |  |  |
|  | I have already seen a psychologist or psychiatrist for treatment of a serious psychological disorder. |  |  |  |  |
|  | Sometimes I tolerate the thoughts of illness so much that I want to cry. |  |  |  |  |
|  | Ever since I found out about Corona, I have limited my relationships with my relatives and friends (even if I was not in quarantine, I would still do so). |  |  |  |  |
|  | I disinfect my hands, cell phone and tools several times a day. |  |  |  |  |
|  | Every time I disinfect my equipment, I think about how much virus may still be on it. |  |  |  |  |
|  | When someone send jokes about Corona to me, not only do I not laugh but I get nervous. |  |  |  |  |
|  | Usually there is anxiety in my life more than in the lives of others. |  |  |  |  |
|  | For at least half of my life I have suffered from stomach problems or headaches that have no medical cause. |  |  |  |  |
|  | The thought of infected others by me drives me crazy. |  |  |  |  |
|  | I use so many disinfectants that others complain. |  |  |  |  |
|  | I avoid people who talk a lot about Corona. |  |  |  |  |
|  | I believe that God is protecting of me always. |  |  |  |  |
|  | I have a lot of friends. |  |  |  |  |
|  | My financial problems are bother me. |  |  |  |  |
|  | I have constant mental conflicts with myself or my work. |  |  |  |  |
|  | No one understand me. |  |  |  |  |
|  | I do not believe in myself so much that others consider me obsessive. |  |  |  |  |
